# Supplementary material
Source: publisher figshare collection journal article supplement (https://acs.figshare.com/ndownloader/files/4472227)
Supplement: Supplementary file 1 [file 4472227]

**Supporting Material to:**

# Strategy for Rapid and High Purity Cyclic Polymers by CuAAC ‘Click’ Reactions.

*Daria E. Lonsdale, Craig A. Bell and Michael J. Monteiro\**

Australian Institute for Bioengineering and Nanotechnology, University of  
Queensland, Brisbane QLD 4072, Australia

\*author to whom correspondence should be sent:

e-mail: [m.monteiro@uq.edu.au](mailto:m.monteiro@uq.edu.au)

**Table S1:** Conditions for the synthesis of polystyrene polymers by Atom Transfer Radical Polymerization (ATRP). Refer to experimental section for a typical cyclization procedure.

|                           | Concentration (mol/L) |           |        |                                   |         | Toluene<br>(mL) | Time<br>(min) |
|---------------------------|-----------------------|-----------|--------|-----------------------------------|---------|-----------------|---------------|
|                           | Styrene               | Initiator | PMDETA | Cu(II)Br <sub>2</sub> /<br>PMDETA | Cu(I)Br |                 |               |
| ≡-PSTY <sub>51</sub> -Br  | 8.977                 | 0.064     | 0.064  | 0.013                             | 0.064   | -               | 360           |
| ≡-PSTY <sub>104</sub> -Br | 9.027                 | 0.035     | 0.035  | 0.008                             | 0.035   | -               | 465           |
| ≡-PSTY <sub>136</sub> -Br | 7.531                 | 0.019     | 0.019  | 0.004                             | 0.019   | 2               | 555           |

**Table S2:** Experimental conditions for cyclization of  $\equiv$ -PSTY<sub>51</sub>-N<sub>3</sub>. A general procedure for cyclization involves addition of  $\equiv$ -PSTY<sub>51</sub>-N<sub>3</sub> in toluene via a syringe pump at a certain feed rate and temperature into a reaction vessel containing Cu(I)Br and PMDETA (stoichiometric to Cu(I)Br) in toluene.

| Expt | M <sub>n</sub> <sup>a</sup><br>$\equiv$ -PSTY <sub>51</sub> -N <sub>3</sub> | Temp<br>(°C) | Feed Rate<br>(ml/min) | Syringe                                              |                 | Reaction Vessel                         |                 | Product               |                          |
|------|-----------------------------------------------------------------------------|--------------|-----------------------|------------------------------------------------------|-----------------|-----------------------------------------|-----------------|-----------------------|--------------------------|
|      |                                                                             |              |                       | $\equiv$ -PSTY <sub>51</sub> -N <sub>3</sub><br>(mg) | Toluene<br>(mL) | Cu(I)Br<br>mole<br>excess to<br>polymer | Toluene<br>(mL) | Purity % <sup>c</sup> | Time <sup>d</sup><br>(h) |
| 1    | 5400 (3a)                                                                   | 80           | 0.003                 | 20                                                   | 1               | 100                                     | 50              | 93                    | 8.6                      |
| 2    |                                                                             | 50           | 0.003                 | 20                                                   | 1               | 100                                     | 50              | 91                    | 8.6                      |
| 3    |                                                                             | 25           | 0.003                 | 20                                                   | 1               | 100                                     | 50              | 93                    | 8.6                      |
| 4    |                                                                             | 25           | 0.003                 | 20                                                   | 1               | 100                                     | 25              | 91                    | 8.6                      |
| 5    |                                                                             | 25           | 0.003                 | 20                                                   | 1               | 100                                     | 1               | 90                    | 8.6                      |
| 6    |                                                                             | 25           | 0.003                 | 20                                                   | 1               | 50                                      | 1               | 92                    | 8.6                      |
| 7    |                                                                             | 25           | 0.003                 | 20                                                   | 1               | 25                                      | 1               | 90                    | 8.6                      |
| 8    |                                                                             | 25           | 0.003                 | 20                                                   | 1               | 10                                      | 1               | 84                    | 8.6                      |
| 9    |                                                                             | 25           | 0.003                 | 20                                                   | 1               | 1                                       | 1               | 66                    | 8.6                      |
| 10   |                                                                             | 25           | 0.003                 | 20                                                   | 1               | 50                                      | 1               | 95                    | 8.6                      |
| 11   |                                                                             | 25           | 0.006                 | 20                                                   | 1               | 50                                      | 1               | 96                    | 5.8                      |
| 12   |                                                                             | 25           | 0.009                 | 20                                                   | 1               | 50                                      | 1               | 96                    | 4.9                      |
| 13   |                                                                             | 25           | 0.012                 | 20                                                   | 1               | 50                                      | 1               | 96                    | 4.4                      |
| 14   |                                                                             | 25           | 0.024                 | 20                                                   | 1               | 50                                      | 1               | 96                    | 3.7                      |
| 15   |                                                                             | 25           | 0.034                 | 20                                                   | 1               | 50                                      | 1               | 95                    | 3.5                      |
| 16   |                                                                             | 25           | 0.094                 | 20                                                   | 1               | 50                                      | 1               | 96                    | 3.2                      |
| 17   |                                                                             | 25           | 0.124                 | 20                                                   | 1               | 50                                      | 1               | 96                    | 3.1                      |
| 18   |                                                                             | 25           | One pot <sup>b</sup>  | 20                                                   | -               | 50                                      | 2               | 83                    | 4                        |
| 19   |                                                                             | 25           | 0.012                 | 60                                                   | 3               | 50                                      | 3               | 96                    | 17                       |
| 20   |                                                                             | 80           | 0.012                 | 60                                                   | 3               | 50                                      | 3               | 96                    | 17                       |

<sup>a</sup> M<sub>n</sub> was acquired using Triple Detection SEC

<sup>b</sup> The only exception to the general cyclization procedure:  $\equiv$ -PSTY<sub>51</sub>-N<sub>3</sub> was added straight into the reaction vessel, without the use of a syringe pump.

<sup>c</sup> Purity is the percentage of cyclic product in the final polymer mixture determined from SEC trace based on a polystyrene calibration curve

<sup>d</sup> Time at which the reaction was stopped and purity of the cyclic product determined

**Table S3:** Experimental conditions for cyclization of  $\equiv\text{-PSTY}_{104}\text{-N}_3$  and  $\equiv\text{-PSTY}_{136}\text{-N}_3$ . A general procedure for cyclization involves addition of polymer in toluene via a syringe pump at a certain feed rate and temperature into a reaction vessel containing Cu(I)Br and PMDETA (stoichiometric to Cu(I)Br) in toluene).

| Expt | $M_n^a$<br>$\equiv\text{-PSTY}_n\text{-N}_3$ | Temp<br>(°C) | Feed Rate<br>(ml/min) | Syringe                                   |                 | Reaction Vessel                         |                 | Product               |                          |
|------|----------------------------------------------|--------------|-----------------------|-------------------------------------------|-----------------|-----------------------------------------|-----------------|-----------------------|--------------------------|
|      |                                              |              |                       | $\equiv\text{-PSTY}_n\text{-N}_3$<br>(mg) | Toluene<br>(mL) | Cu(I)Br<br>mole<br>excess to<br>polymer | Toluene<br>(mL) | Purity % <sup>c</sup> | Time <sup>d</sup><br>(h) |
| 21   | 10800 (n=104)                                | 25           | One pot <sup>b</sup>  | 20                                        | -               | 50                                      | 2               | 57                    | 4                        |
| 22   |                                              | 25           | 0.012                 | 60                                        | 3               | 50                                      | 3               | 89                    | 17                       |
| 23   |                                              | 80           | 0.012                 | 60                                        | 3               | 50                                      | 3               | 92                    | 17                       |
| 24   |                                              | 80           | 0.012                 | 40                                        | 2               | 50                                      | 2               | 92                    | 5.8                      |
| 25   |                                              | 25           | 0.012                 | 40                                        | 2               | 50                                      | 2               | 93                    | 5.8                      |
| 26   |                                              | 25           | 0.034                 | 20                                        | 2               | 50                                      | 2               | 94                    | 4.0                      |
| 27   |                                              | 25           | 0.034                 | 40                                        | 2               | 50                                      | 2               | 91                    | 4.0                      |
| 28   |                                              | 25           | 0.034                 | 60                                        | 2               | 50                                      | 2               | 85                    | 4.0                      |
| 29   | 14400 (n=136)                                | 25           | One pot <sup>b</sup>  | 20                                        | -               | 50                                      | 2               | 54                    | 4                        |
| 30   |                                              | 80           | 0.012                 | 60                                        | 3               | 50                                      | 3               | 93                    | 17                       |
| 31   |                                              | 25           | 0.012                 | 60                                        | 3               | 50                                      | 3               | 88                    | 17                       |
| 32   |                                              | 80           | 0.012                 | 40                                        | 2               | 50                                      | 2               | 92                    | 5.8                      |
| 33   |                                              | 25           | 0.012                 | 40                                        | 2               | 50                                      | 2               | 88                    | 5.8                      |

<sup>a</sup>  $M_n$  was acquired using Triple Detection SEC

<sup>b</sup> The only exception to the general cyclization procedure:  $\equiv\text{-PSTY}_n\text{-N}_3$  was added straight into the reaction vessel, without the use of a syringe pump.

<sup>c</sup> Purity is the percentage of cyclic product in the final polymer mixture determined from SEC trace based on a polystyrene calibration curve

<sup>d</sup> Time at which the reaction was stopped and purity of the cyclic product determined

**Table S4:** Comparison of molecular weight distributions (MWD) of  $\equiv$ -PSTY<sub>51</sub>-N<sub>3</sub> vs c-PSTY<sub>51</sub> cyclized at 80 °C, 50 °C and 25 °C. The cyclizations were achieved by feeding  $\equiv$ -PSTY<sub>51</sub>-N<sub>3</sub> (20 mg in 1 mL of toluene) at the rate of 0.003 mL/min into 50 mL of toluene containing Cu(I)Br and PMDETA (x100 mole excess to PSTY): Refer to Table S2 (entries 1-3).

| Polymer                                      | Temp (°C)<br>of cyclization <sup>c</sup> | PSTY Calibration Curve <sup>a</sup> |                |      |                          | Triple Detection <sup>b</sup> |                |      |
|----------------------------------------------|------------------------------------------|-------------------------------------|----------------|------|--------------------------|-------------------------------|----------------|------|
|                                              |                                          | M <sub>n</sub>                      | M <sub>P</sub> | PDI  | Purity <sup>d</sup><br>% | M <sub>n</sub>                | M <sub>P</sub> | PDI  |
| $\equiv$ -PSTY <sub>51</sub> -N <sub>3</sub> |                                          | 5000                                | 5200           | 1.12 |                          | 5400                          | 5600           | 1.08 |
| c-PSTY <sub>51</sub>                         | 80                                       | 4000                                | 4200           | 1.27 | 93                       | 5600                          | 5700           | 1.16 |
| c-PSTY <sub>51</sub>                         | 50                                       | 4100                                | 4000           | 1.28 | 91                       | 5700                          | 5700           | 1.17 |
| c-PSTY <sub>51</sub>                         | 25                                       | 4000                                | 4200           | 1.27 | 93                       | 5700                          | 5700           | 1.16 |

<sup>a</sup> The data was acquired using SEC based on polystyrene calibration curve

<sup>b</sup> The data was acquired using Triple Detection SEC

<sup>c</sup> Temperature at which  $\equiv$ -PSTY<sub>51</sub>-N<sub>3</sub> was cyclised

<sup>d</sup> Purity is the percentage of cyclic product in the final polymer mixture determined from SEC trace based on polystyrene calibration curve.

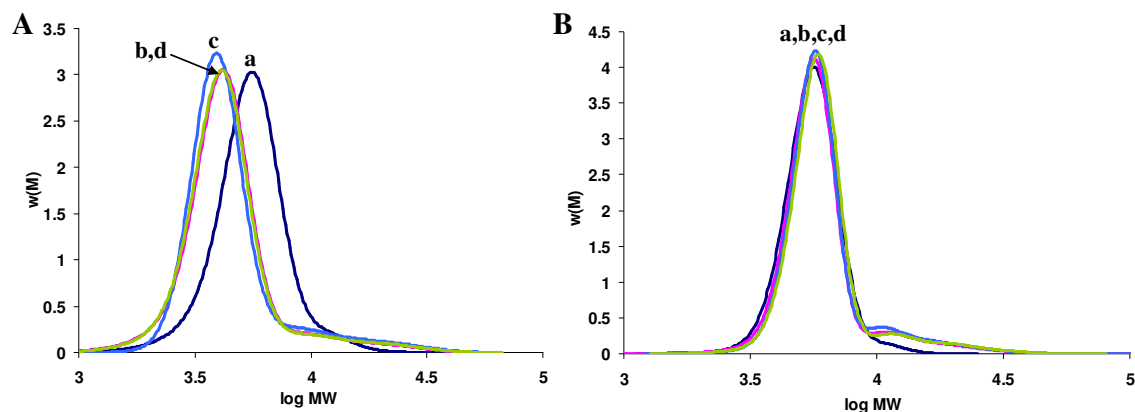

**Figure S1:** Effect of temperature on cyclization of  $\equiv$ -PSTY<sub>51</sub>-N<sub>3</sub> analysed by SEC based on: (A) Polystyrene calibration curve; (B) Triple Detection SEC (absolute molecular weights). (a)  $\equiv$ -PSTY<sub>51</sub>-N<sub>3</sub>; (b) c-PSTY<sub>51</sub>, cyclized at 80 °C; (c) c-PSTY<sub>51</sub>, cyclized at 50 °C; (d) c-PSTY<sub>51</sub>, cyclized at 25 °C. All cyclizations were performed by feeding 20 mg of  $\equiv$ -PSTY<sub>51</sub>-N<sub>3</sub> in 1 mL of toluene, at a feed rate of 0.003 mL/min, into 50 mL of toluene containing Cu(I)Br and PMDETA (x100 mole excess to PSTY): Refer to Table S2 (entries 1-3).

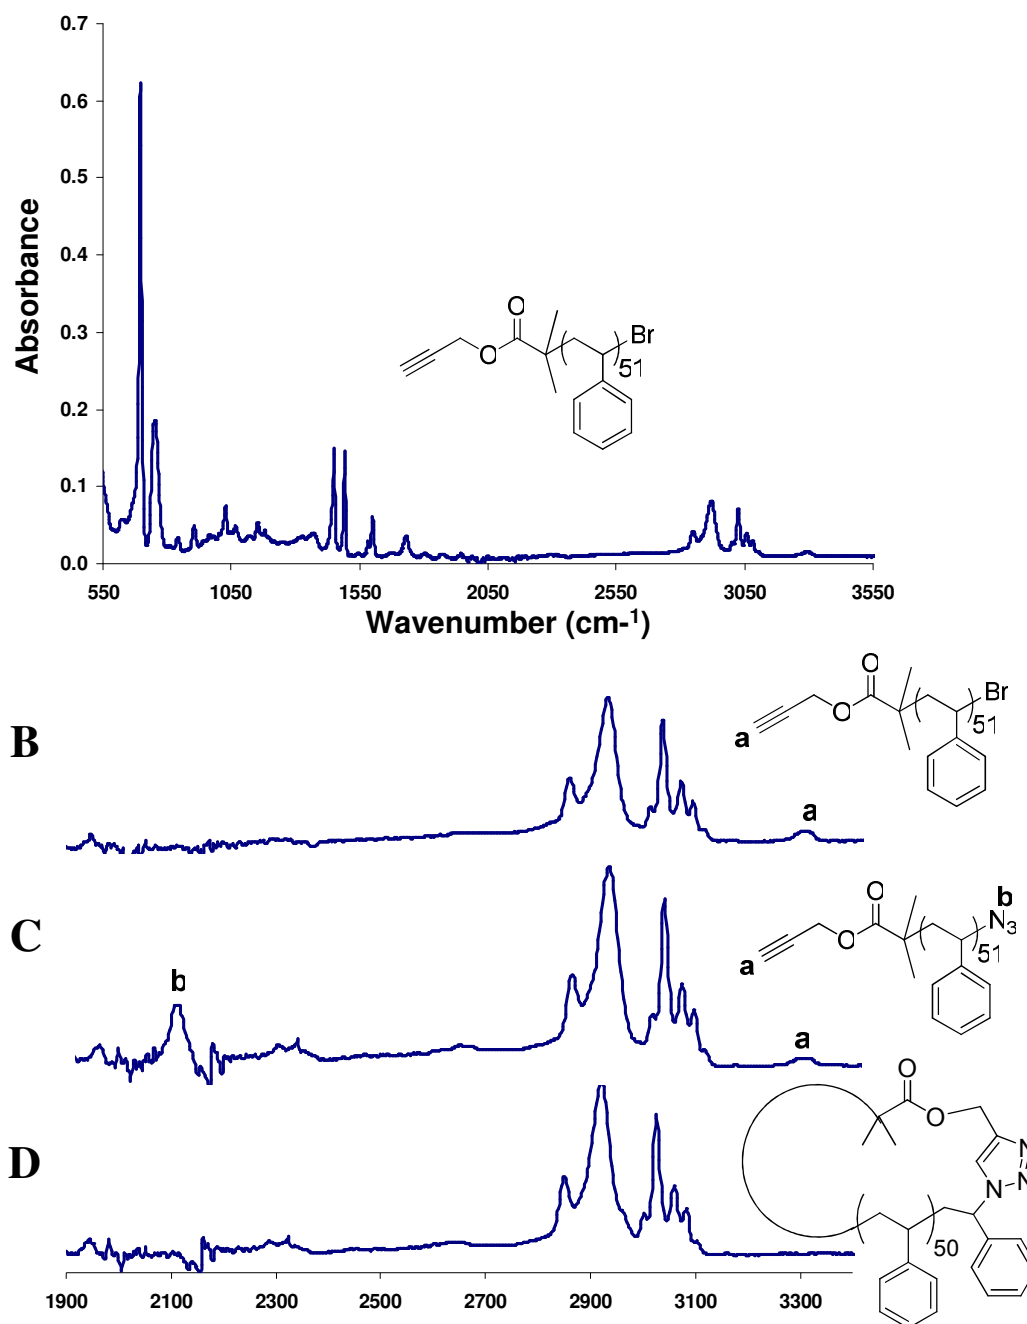

**Figure S2:** ATR-FTIR analysis of the polystyrene chain-end modification and cyclization. (A) Full spectrum of  $\equiv$ -PSTY<sub>51</sub>-Br; (B) Expanded spectrum of  $\equiv$ -PSTY<sub>51</sub>-Br; (C) Expanded spectrum of  $\equiv$ -PSTY<sub>51</sub>-N<sub>3</sub>; (D) Expanded spectrum of c-PSTY<sub>51</sub> cyclized by feeding 20 mg of  $\equiv$ -PSTY<sub>51</sub>-N<sub>3</sub> in 1 mL of toluene, at a feed rate of 0.003 mL/min, into 50 mL of toluene containing Cu(I)Br and PMDETA (x100 mole excess to PSTY) at 80 °C: Refer to Table S2 (entry 1). (a) alkyne stretch at 3295 cm<sup>-1</sup>, (b) azide stretch at 2095 cm<sup>-1</sup>.

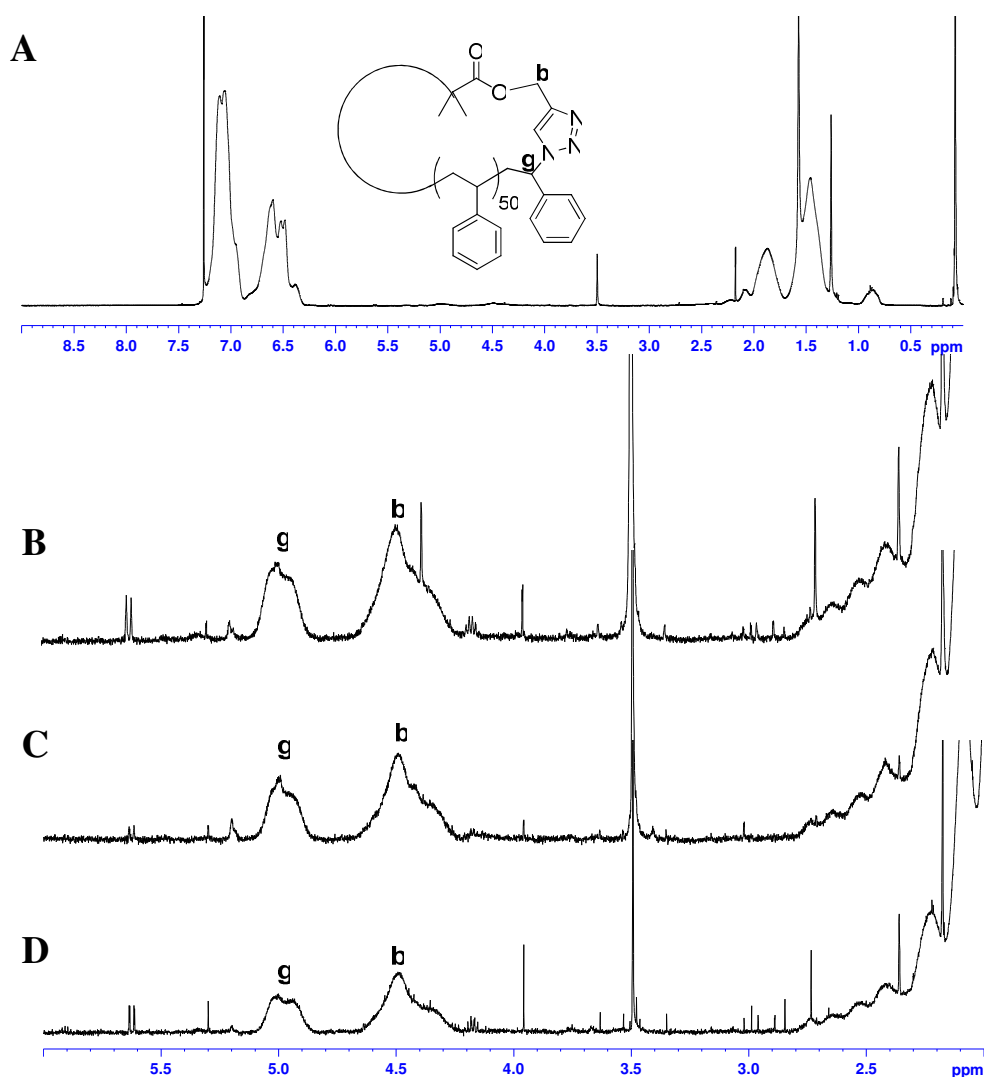

**Figure S3:** 500 MHz  $^1\text{H}$  NMR analysis of c-PSTY<sub>51</sub> cyclized at different temperatures. (A) Full spectrum of c-PSTY<sub>51</sub> cyclized at 80 °C. Below, overlaid expanded spectra of c-PSTY<sub>51</sub>, cyclized at (B) 80 °C, (C) 50 °C, (D) 25 °C. All cyclizations were performed by feeding 20 mg of  $\equiv$ -PSTY<sub>51</sub>-N<sub>3</sub> in 1 mL of toluene, at a feed rate of 0.003 mL/min into a reaction vessel containing 50 mL of toluene, Cu(I)Br and PMDETA (x100 mole excess to polymer). Refer to Table S2 (entries 1-3).

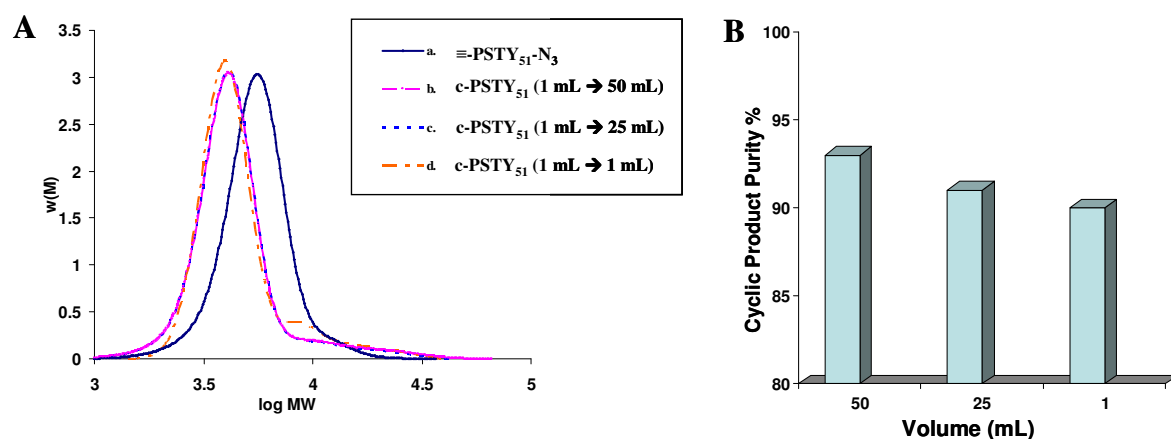

**Figure S4:** Effect of reaction volume on cyclization of  $\equiv$ -PSTY<sub>51</sub>-N<sub>3</sub> at 25 °C. (A) SEC analysis of  $\equiv$ -PSTY<sub>51</sub>-N<sub>3</sub>; **a.** prior to cyclization, **b.** cyclized in 50 mL, **c.** cyclized in 25 mL, **d.** cyclized in 1 mL. Refer to Table S2 (entries 3-5). (B) Represents the % purity of cyclic products, determined from SEC traces **b-d**. All reactions were fed from 1 mL (20 mg/mL of PSTY in toluene) at a feed rate of 0.003 mL/min into the reaction vessel containing Cu(I)Br, PMDETA (x100 mole excess to PSTY).

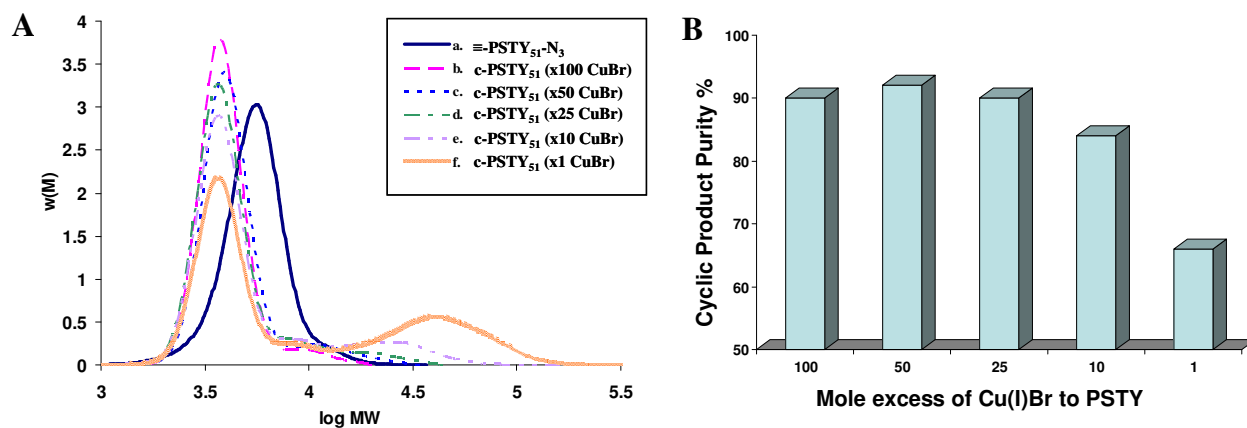

**Figure S5:** Effect of Cu(I)Br concentration on cyclization of  $\equiv$ -PSTY<sub>51</sub>-N<sub>3</sub> at 25 °C. (A) SEC analysis of  $\equiv$ -PSTY<sub>51</sub>-N<sub>3</sub> **a.** prior to cyclization, **b.** cyclized with x100 mole excess of Cu(I)Br to PSTY, **c.** cyclized with x50 mole excess of Cu(I)Br to PSTY, **d.** cyclized with x25 mole excess of Cu(I)Br to PSTY, **e.** cyclized with x10 mole excess of Cu(I)Br to PSTY, **f.** cyclized with x1 mole excess of Cu(I)Br to PSTY. (B) Represents the % purity of cyclic products, determined from SEC trace, with decreasing Cu(I)Br concentration. All reactions were fed from 1 mL (20 mg/mL in toluene) at a feed rate of 0.003 mL/min into the reaction vessel containing 1 mL of toluene and various amounts of Cu(I)Br and PMDETA (**b-f**). Refer to Table S2 (entries 5-9).



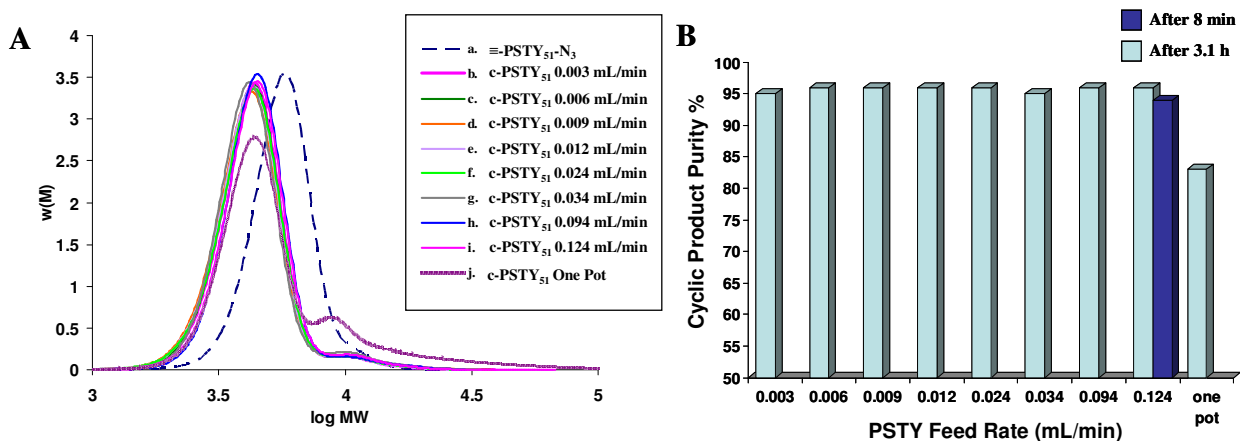

**Figure S6:** The effect of feed rate on cyclization of  $\equiv$ -PSTY<sub>51</sub>-N<sub>3</sub> at 25 °C. **(A)** SEC analysis based on polystyrene calibration curve. Cyclizations **b-i** were done by feeding 20 mg of PSTY in 1 mL of toluene into a reaction vessel containing toluene (1mL), Cu(I)Br and PMDETA (x50 mole excess to polymer) at various feed rates (**b-i**). **i.** was done in one pot with no other variations to reactants or reaction conditions. Refer to Table S2 (entries 10-18). **(B)** Represents the % purity of cyclic products, determined from SEC trace, with increasing feed rate, including one-pot reaction.

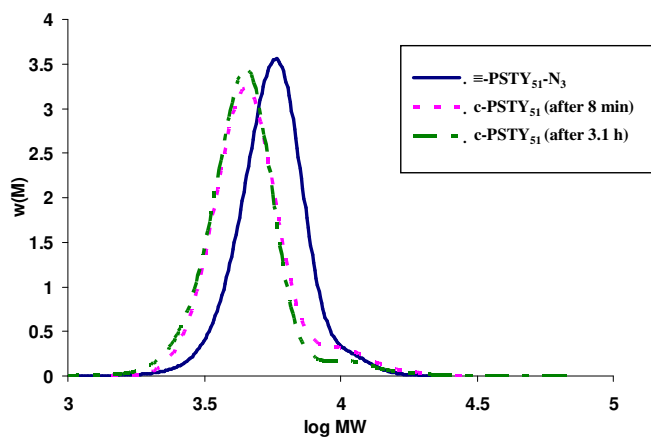

**Figure S7:** Rate of cyclization of l-PSTY determined by SEC analysis of samples taken after 8 min and 3.1 h from the start of the reaction. Cyclization was done by feeding 20 mg of PSTY in 1 mL of toluene into a reaction vessel containing toluene (1mL), Cu(I)Br and PMDETA (x50 mole excess to polymer) at a feed rate of 0.124 mL/min and 25 °C. Refer to Table S2 (entry 17).

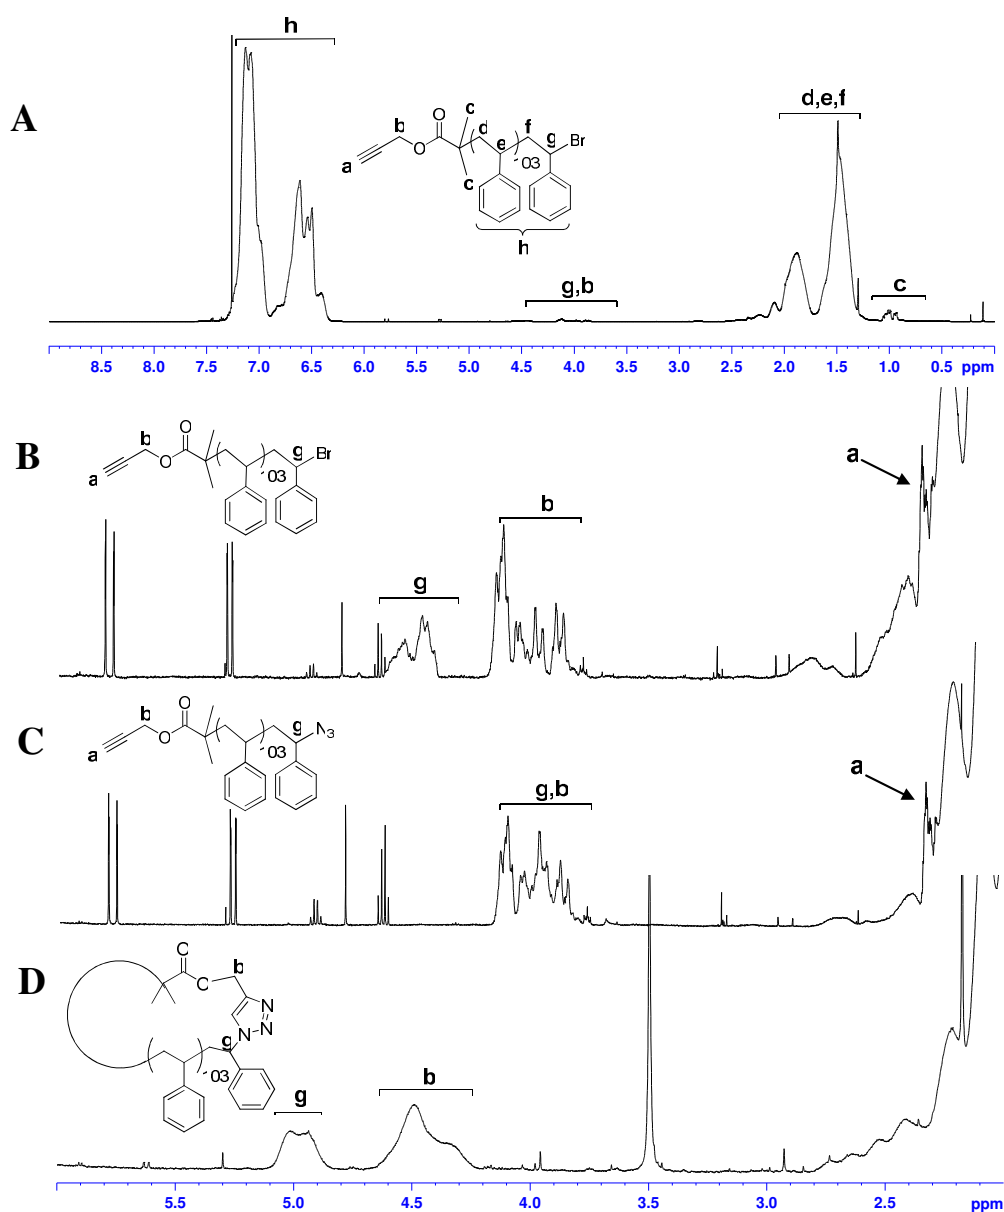

**Figure S8:** 500 MHz  $^1\text{H}$  NMR analysis l-PSTY ( $M_n = 10800$ , PDI = 1.05) chain-end modification and cyclization. **(A)** Full spectrum of  $\equiv\text{-PSTY}_{104}\text{-Br}$ ; **(B)** Expanded spectrum of  $\equiv\text{-PSTY}_{104}\text{-Br}$ ; **(C)** Expanded spectrum of  $\equiv\text{-PSTY}_{104}\text{-N}_3$ ; **(D)** Expanded spectrum of c-PSTY<sub>104</sub> cyclized by feeding 40 mg of  $\equiv\text{-PSTY}_{104}\text{-N}_3$  in 2 mL of toluene, at a feed rate of 0.012 mL/min into 2 mL of toluene containing Cu(I)Br and PMDETA (x50 mole excess to PSTY) at 80 °C. Refer to Table S3 (entry 24).

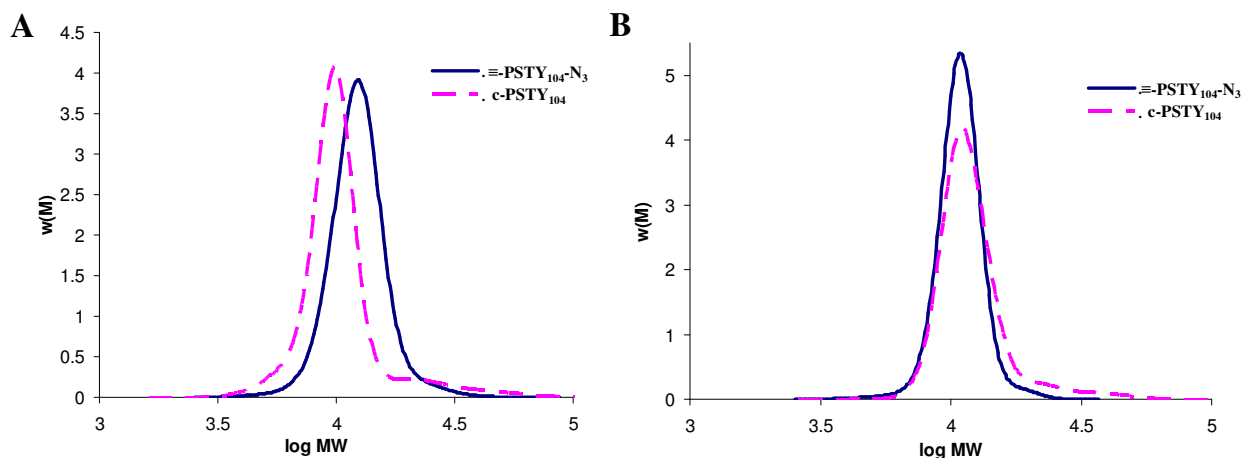

**Figure S9:** SEC chromatograms of  $\equiv$ -PSTY<sub>104</sub>-N<sub>3</sub> and c-PSTY<sub>104</sub> (A) Based on PSTY calibration curve and (B) Triple Detection SEC (absolute molecular weights). The cyclization was done by adding 40 mg of PSTY in 2 mL of toluene to a reaction vessel containing 2 mL of toluene, Cu(I)Br and PMDETA (x50 mole excess to PSTY) at a rate of 0.012 mL/min and temperature of 80 °C. Refer to Table S3 (entry 24).

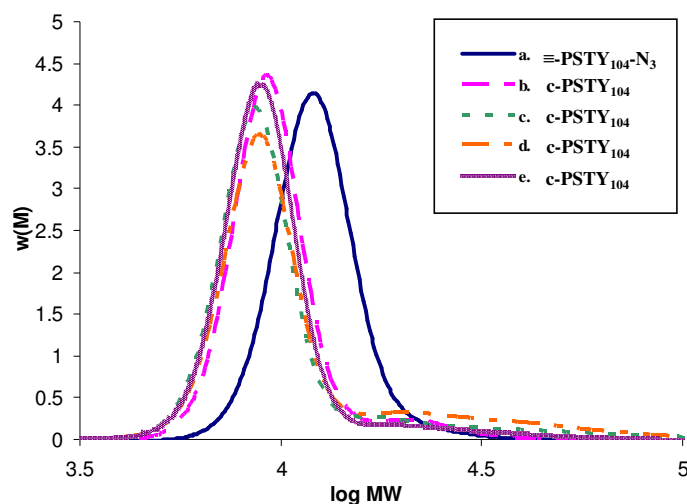

**Figure S10:** SEC chromatograms of  $\equiv$ -PSTY<sub>104</sub>-N<sub>3</sub> and c-PSTY<sub>104</sub> cyclized at 25 °C. **a.**  $\equiv$ -PSTY<sub>104</sub>-N<sub>3</sub>; **b.** c-PSTY<sub>104</sub> cyclized by feeding 40 mg of PSTY in 2 mL of toluene to a reaction vessel of toluene (2mL), Cu(I)Br and PMDETA (x50 mole excess to PSTY) at a rate of 0.012 mL/min. **c.** The same conditions as **b** but with a feed rate of 0.034 mL/min. **d.** The same conditions as **c** but increased PSTY concentration to 60 mg of PSTY in 2 mL of toluene. **e.** The same conditions as **d** but with decreased PSTY concentration to 20 mg in 2 mL of toluene. Refer to Table S3 (entries 25-28).

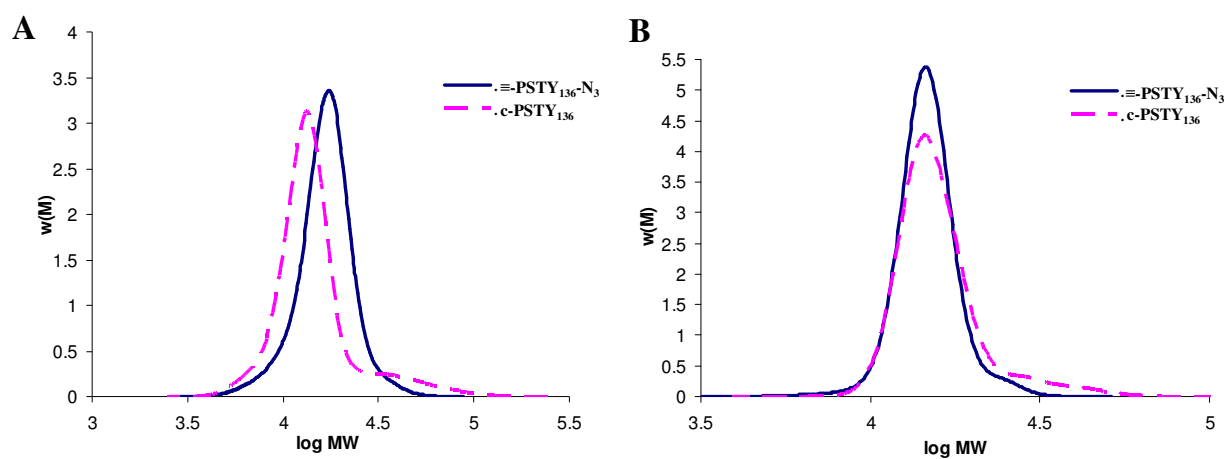

**Figure S11:** SEC chromatograms of  $\equiv$ -PSTY<sub>136</sub>-N<sub>3</sub> and c-PSTY<sub>136</sub> (**A**) Based on PSTY calibration curve; (**B**) Triple Detection SEC (absolute molecular weights). The cyclization was done by adding 40 mg of PSTY in 2 mL of toluene, at a rate of 0.012 mL/min, to 2 mL of toluene containing Cu(I)Br and PMDETA (x50 mole excess to PSTY) at 80 °C. Refer to Table S3 (entry 32).
